# Supplementary material
Source: PubMed Central journal article supplement (PMC4291369)
Supplement: AAC.04077-14_zac001153592so1.pdf [file AAC.04077-14_zac001153592so1.pdf]

## **Supplementary Materials**

Target-Based Resistance in *Pseudomonas aeruginosa* and *Escherichia coli* to NBTI 5463, a Novel Bacterial Type II Topoisomerase Inhibitor

Nayar et al.

## Supplementary Materials

### Supplemental Methods

Construction of pMMB67::*nfxB* expression plasmid. PAO1 genomic DNA was employed to amplify the *nfxB* gene using the primers NfxB-F and NfxB-R (Table S1). The forward sequence included the *nfxB* ribosome binding site, which is necessary for expression from the tac promoter on the pMMB67 plasmid (1). The gene was amplified using Q5 polymerase (New England Biolabs NEB), and the amplicon and pMMB plasmid were subsequently digested with *EcoRI* and *BamHI* (NEB) for 60 minutes. After digestion and concentration with a Zymo DNA Clean and Concentrator kit, the amplicon and plasmid were ligated for 60 minutes at 16°C with T4 DNA ligase (NEB). The ligated DNA was transformed into competent *E. coli* DH5 $\alpha$  and selected on LB ampicillin (100  $\mu$ g/ml) plates. The next day a single colony was selected and inoculated into 10 ml of LB ampicillin broth, and after overnight growth, plasmid was purified (QIAprep Spin Miniprep Kit). The DNA was sequenced to confirm the correct *nfxB* sequence. The three *Pseudomonas* strains (AZ392, 394 and 396) were electroporated with both pMMB67EH and pMMB67::*nfxB* using the procedure of Choi et al (2). During MIC determinations, NfxB expression was induced with 100  $\mu$ M IPTG.

1. **Fürste JP, Pansegrau W, Frank R, Blöker H, Scholz P, Bagdasarian M, Lanka E.** 1986. Molecular cloning of the plasmid RP4 primase region in a multi-host-range tacP expression vector. *Gene* 48: 119-131.
2. **Choi K-Y, Kumar A, Schweizer, HP.** 2006. A 10-min method for preparation of highly electrocompetent *Pseudomonas aeruginosa* cells: Application for DNA fragment transfer between chromosomes and plasmid transformation. *J. Microbiol. Methods.* 64: 391–397.

**Table S1.**  
Primer sequences

| Primer name | Sequence                                                      | Primer details                                                                             |
|-------------|---------------------------------------------------------------|--------------------------------------------------------------------------------------------|
| Asp-Glu-F   | CCATCCCCATGGTGAATCGGCCGTCTATGAC                               | Quik change primers to make the Asp82Glu mutation in <i>gyrA</i> of <i>E.coli</i>          |
| Asp-Glu-F-r | GTCATAGACCGCCGATTACCATGGGGATGG                                | Quik change primers to make the Asp82Glu mutation in <i>gyrA</i> of <i>E.coli</i>          |
| Asp-Gly-F   | GGTAAATACCATCCCCATGGTGGCTCGGCCGTCT<br>ATGACACGATC             | Quik change primers to make the Asp82Gly mutation in <i>gyrA</i> of <i>E.coli</i>          |
| Asp-Gly-F-r | GATCGTGCATAGACCGCCGAGCCACCATGGGGA<br>TGGTATTTACC              | Quik change primers to make the Asp82Gly mutation in <i>gyrA</i> of <i>E.coli</i>          |
| EcogyrAF    | GCGACCTTGCAGAGAAATTAC                                         | forward primer to amplify the first 500 bp of <i>E.coli gyrA</i>                           |
| EcogyrAR    | CTACGGCGATACCGGAAGAAC                                         | reverse primer to amplify the first 500 bp of <i>E.coli gyrA</i>                           |
| YfaLP1      | CACCCCGTTGCTTCACCGCATCGTCACTGATAGT<br>GCGTGTAGGCTGGAGCTGCTTCG | Forward primer used to insert kanamycin resistant gene in <i>yfaL</i>                      |
| YfaLP2      | GCACGGTAATCAGAAGCAAGGGGCCTGGCTGGA<br>TAGCATATGAATATCCTCCTTA   | Reverse primer used to insert kanamycin resistant gene in <i>yfaL</i>                      |
| YfaLF       | CATCACTCCCTTTCTGCCAC                                          | forward primer to confirm the insertion of kanamycin resistant gene in <i>yfaL</i>         |
| YfaLR       | GAACTCGCGCCGATAACCAG                                          | reverse primer to confirm the insertion of kanamycin resistant gene in <i>yfaL</i>         |
| ygiU-P1     | TTAGGTTATAACTAAAGTAACAGGGAGGCGGGG<br>GTTGTGTAGGCTGGAGCTGCTTCG | Forward primer used to insert kanamycin resistant gene in <i>ygiU</i>                      |
| ygiU-P2     | ACCATTTCTCCCTGGTGGCAAACCGGACATTTCA<br>TACATATGAATATCCTCCTTA   | Reverse primer used to insert kanamycin resistant gene in <i>ygiU</i>                      |
| ygiU -F     | GGTCACTATCTCCGTACATC                                          | forward outside primer to confirm the insertion of kanamycin resistant gene in <i>ygiU</i> |
| ygiU -R     | CGTCCACGGAAGGTGTATGG                                          | reverse outside primer to confirm the insertion of kanamycin resistant gene in <i>ygiU</i> |
| ygiU -In-F  | CTTGTCAATGCCGGCAAGTTC                                         | forward inside primer to confirm the insertion of kanamycin resistant gene in <i>ygiU</i>  |
| ygiU -In-R  | CGATCAGTACGTCATGAATTAC                                        | reverse inside primer to confirm the insertion of kanamycin resistant gene in <i>ygiU</i>  |
| ECA-A For   | GTATAGGTTTACCTCAAACCTGCGC                                     | forward primer to amplify <i>E.coli gyrA</i>                                               |
| ECA-A Rev   | CAAAAGCCCAGACTTTGCAGCCTGG                                     | reverse primer to amplify <i>E.coli gyrA</i>                                               |
| EcGyBFor    | GGGTAATAAACGGATTAACCC                                         | forward primer to sequence the 5' end of <i>E.coli gyrB</i>                                |
| EcGyBJ      | GAGTCCCCTTCCACCAGGTAC                                         | reverse primer to sequence the 5' end of <i>E.coli gyrB</i>                                |
| EcGyBC      | CGTGGTTGGCAAAAATTATCG                                         | forward primer to sequence the 3' end of <i>E.coli gyrB</i>                                |
| EcGyBRev2   | CGATATTCGCCGCTTTCAGG                                          | reverse primer to sequence the 3' end of <i>E.coli gyrB</i>                                |

|           |                                |                                                             |
|-----------|--------------------------------|-------------------------------------------------------------|
| ECC-For   | CGGCAGATAATGTAGTATCTCCGG       | <i>gyrB</i>                                                 |
| ECC-Rev   | GACGACTTAACGTTTCATCCGGCG       | forward primer to amplify <i>E.coli parC</i>                |
| EcParEFor | GGTCTGCACCATCTCTGACG           | reverse primer to amplify <i>E.coli parC</i>                |
| NfxB-F    | GGAATTCGCCAGTTTTCTGCACAATGCGC  | forward primer to sequence the 5' end of <i>E.coli parE</i> |
| NfxB-R    | CGGGATCCGGTCAGGAGCGAGCCGGATTGG | Forward primer to amplify <i>P. aeruginosa nfxB</i>         |
| EcParEH   | CAGCGATCCCAGATATCTTCC          | Reverse primer to amplify <i>P. aeruginosa nfxB</i>         |
| EcParEB   | GGTAATTTTCGCTGGTGATACTG        | reverse primer to sequence the 5' end of <i>E.coli parE</i> |
| EcParEK   | GCCATGTCGCCTTTCTCTTGC          | <i>parE</i>                                                 |
| ECA-A     | CGTTATACGGAAATCCGTCTGGCG       | forward primer to sequence the 3' end of <i>E.coli parE</i> |
| ECA-B     | TTCCGTATCAGGTAACAAAGCGC        | reverse primer to sequence the 3' end of <i>E.coli parE</i> |
| ECA-C     | CGTGGCAGCTGGGCAACGTTGCCG       | sequencing primers for <i>E.coli gyrA</i>                   |
| ECA-D     | GTGGCGGAAAGGTAAATCTGCCG        | sequencing primers for <i>E.coli gyrA</i>                   |
| ECA-E     | TCTTCTGTCCGTGCGATGGGCTGC       | sequencing primers for <i>E.coli gyrA</i>                   |
| ECA-F     | TGGTTGGGTATTCCGCCACTGCGG       | sequencing primers for <i>E.coli gyrA</i>                   |
| ECA-G     | GCAGGTTGACGATCGGACGACCGC       | sequencing primers for <i>E.coli gyrA</i>                   |
| ECA-H     | GCAGTTTTTTCGTGCTCAAGACCGG      | sequencing primers for <i>E.coli gyrA</i>                   |
| ECA-I     | AAGAAACCTGCAACTGGGTCTGGG       | sequencing primers for <i>E.coli gyrA</i>                   |
| ECA-J     | CCTACGGCGATACCGGAAGAACCG       | sequencing primers for <i>E.coli gyrA</i>                   |
| EcGyBA    | CTGGAGCTGGTTATCCAGCG           | sequencing primers for <i>E.coli gyrB</i>                   |
| EcGyBB    | CGTTGCAGTGAACGATGGC            | sequencing primers for <i>E.coli gyrB</i>                   |
| EcGyBD    | GTACAACCCGGACAAACTGCG          | sequencing primers for <i>E.coli gyrB</i>                   |
| EcGyBE    | GTTTGATGTTACACCAATGC           | sequencing primers for <i>E.coli gyrB</i>                   |
| EcGyBF    | GTTGTTACCACGCTGATGG            | sequencing primers for <i>E.coli gyrB</i>                   |
| EcGyBG    | CGTCATCCTGTACAGAGACAG          | sequencing primers for <i>E.coli gyrB</i>                   |
| EcGyBH    | GGAGTTGAGGAACGACAATC           | sequencing primers for <i>E.coli gyrB</i>                   |
| EcGyBI    | GGAAACGACCGCAATCAGGC           | sequencing primers for <i>E.coli gyrB</i>                   |
| EcGyBJ    | GAGTCCCCTTCCACCAGGTAC          | sequencing primers for <i>E.coli gyrB</i>                   |
| EcGyBK    | CACTGGCGTTGGTGTGCAG            | sequencing primers for <i>E.coli gyrB</i>                   |
| EcGyBL    | CTGCTCGAAGCTGGCTACC            | sequencing primers for <i>E.coli gyrB</i>                   |
| EcGyBRev  | CCTGATAAGCGTAGCGCATC           | sequencing primers for <i>E.coli gyrB</i>                   |
| ECC-A     | CGTTACACCGAATCCCGGTTGTCCG      | sequencing primers for <i>E.coli parC</i>                   |
| ECC-B     | GCGTACTGGAGCAAATTGCTGCGC       | sequencing primers for <i>E.coli parC</i>                   |
| ECC-C     | CGCGGTTTGGCCTTACGGAAACCC       | sequencing primers for <i>E.coli parC</i>                   |
| ECC-D     | GCCATTGACCCGATTACGCTGCCG       | sequencing primers for <i>E.coli parC</i>                   |
| ECC-E     | TTTTCCGGTAAGGTGATCAAAGCC       | sequencing primers for <i>E.coli parC</i>                   |
| ECC-F     | CGAACGACGATCGTCACCGTAGGC       | sequencing primers for <i>E.coli parC</i>                   |
| ECC-G     | TACGATAGCTCTTTTCCAGATCGG       | sequencing primers for <i>E.coli parC</i>                   |
| ECC-H     | AATATCGGTGCCATGCCGACGGC        | sequencing primers for <i>E.coli parC</i>                   |

|            |                         |                                           |
|------------|-------------------------|-------------------------------------------|
| EcParEA    | GGTCAGGTTTATAACATCGCC   | sequencing primers for <i>E.coli parE</i> |
| EcParEC    | GAACCAGAACGTTTCAGGC     | sequencing primers for <i>E.coli parE</i> |
| EcParED    | GCAAAATCTGTATCCTCGCG    | sequencing primers for <i>E.coli parE</i> |
| EcParEE    | GGAAATGAACCCGATGCAATTGC | sequencing primers for <i>E.coli parE</i> |
| EcParEF    | GGTGAATATCCACCGGCATC    | sequencing primers for <i>E.coli parE</i> |
| EcParEFor2 | GCTGATGCCATTGAGGTACTC   | sequencing primers for <i>E.coli parE</i> |
| EcParEG    | CATGCGTCAGGCGTCAAACAG   | sequencing primers for <i>E.coli parE</i> |
| EcParEI    | GGCATGATCGCTGATATTCG    | sequencing primers for <i>E.coli parE</i> |
| EcParEJ    | CCGAGATCAATACGGTAGAGC   | sequencing primers for <i>E.coli parE</i> |
| EcParERev  | CTGACCGGGCAATGTTCTTTCC  | sequencing primers for <i>E.coli parE</i> |

---

**Table S2.** Complementation of second step mutants with plasmid based NfxB expression to restore MexCD OprJ efflux pump suppression

| Strain | Genotype                                   | NBTI 5463 | MIC ( $\mu\text{g/ml}$ ) |              |
|--------|--------------------------------------------|-----------|--------------------------|--------------|
|        |                                            |           | Ciprofloxacin            | Levofloxacin |
| AZ392  | <i>nfxB</i> ( $\Delta$ 490-493), GyrA D82E | 256       | 1                        | 2            |
| AZ394  | <i>nfxB</i> ( $\Delta$ 490-493), GyrA D82N | 256       | 8                        | 8            |
| AZ396  | <i>nfxB</i> ( $\Delta$ 490-493), GyrA D82G | 256       | 4                        | 4            |
| AZ799  | AZ392(pMMB67) <sup>1</sup>                 | 256       | 1                        | 2            |
| AZ800  | AZ392 (pMMB67:: <i>nfxB</i> ) <sup>2</sup> | 16        | 0.125                    | 0.25         |
| AZ801  | AZ394 (pMMB67) <sup>1</sup>                | 256       | 4                        | 8            |
| AZ802  | AZ394 (pMMB67:: <i>nfxB</i> )              | 16        | 0.25                     | 0.5          |
| AZ803  | AZ396 (pMMB67) <sup>1</sup>                | 128       | 2                        | 2            |
| AZ804  | AZ396 (pMMB67:: <i>nfxB</i> )              | 16        | 0.25                     | 0.5          |

<sup>1</sup>pMMB67 empty vector control

<sup>2</sup>pMMB67 with cloned *nfxB* behind the *tac* promoter. 100  $\mu\text{M}$  IPTG induction
